# Supplementary material for: Regulated necrosis-related molecule mRNA expression in humans and mice and in murine acute tissue injury and systemic autoimmunity leading to progressive organ damage, and progressive fibrosis
Source: Oxford University Press journal article supplement (doi:10.1042/bsr20160336), 2016-11-04

**Supplementary Figure 1. H&E staining and PAS injury scores in acute kidney injury.**

Animal models of acute kidney injury were induced as described in methods. A: Representative images of renal sections stained with H&E. Original magnification: x200. B: Quantification of the tubular injury. Data represent means  $\pm$  SEM. \*\*\*P<0.001 either versus control.

**Supplementary Figure 2. RIPK3, collagen-1 $\alpha$ 1 expression and quantification of injury during kidney remodeling in murine chronic oxalate nephropathy.**

Chronic oxalate nephropathy was induced in mice as described in methods. A: Representative images of renal sections stained with RIPK3 at day 0, 7, 14 and 21. Original magnification: x100. B: Representative images of renal sections stained with collagen-1 $\alpha$ 1 at day 0, 7, 14 and 21. Original magnification: x200. C: PAS injury score as described in methods. Data represent means  $\pm$  SEM. \*\*\*P<0.001 either versus day 0.

**Supplementary Figure 3. RIPK3, Collagen-1 $\alpha$ 1 expression and quantification of injury during kidney remodeling in murine chronic kidney disease after ischemia-reperfusion injury.**

Chronic kidney disease after unilateral renal pedicle clamping was induced in mice as described in methods. A: Representative images of renal sections stained with RIPK3 at day 5, 10 and 35. Original magnification: x100. B: Representative images of renal sections stained with collagen-1 $\alpha$ 1 at day 5, 10 and 35. Original magnification: x200. C: PAS injury score as described in methods. Data represent means  $\pm$  SEM. \*\*P<0.01, \*\*\*P<0.001 either versus day 0.

# Supplementary Figure 1

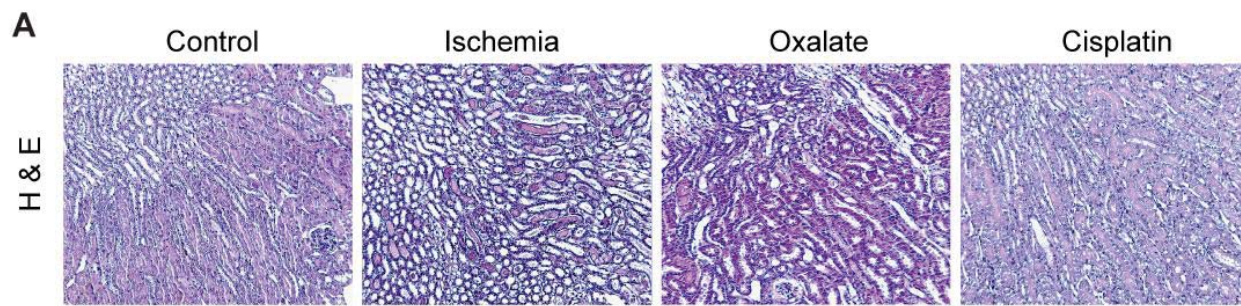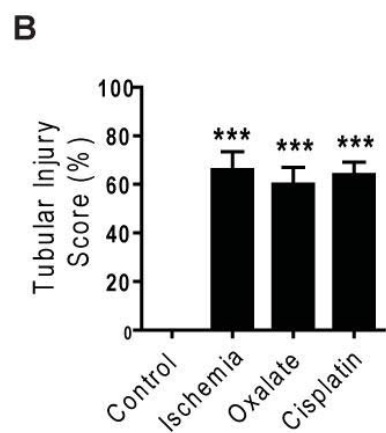

# Supplementary Figure 2

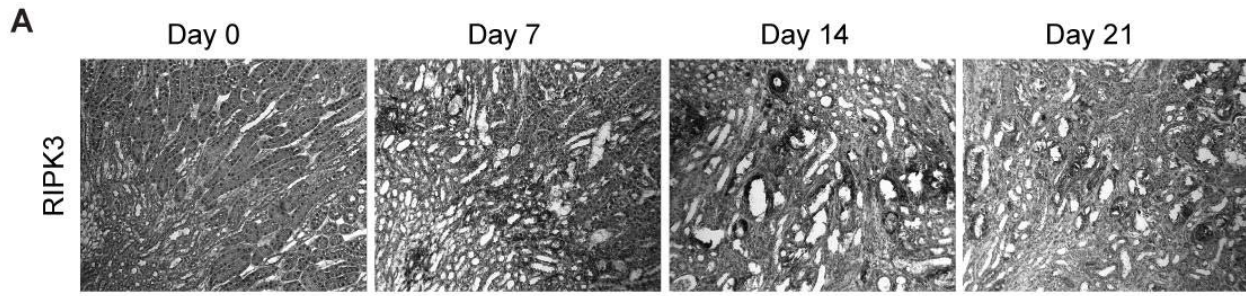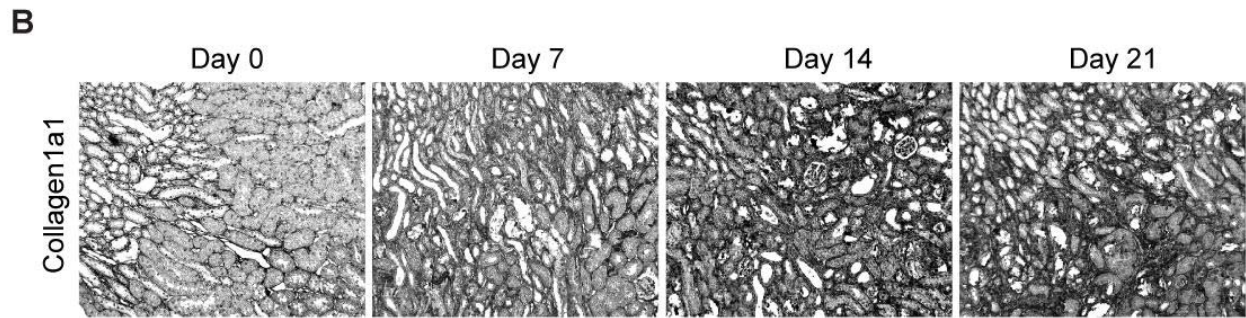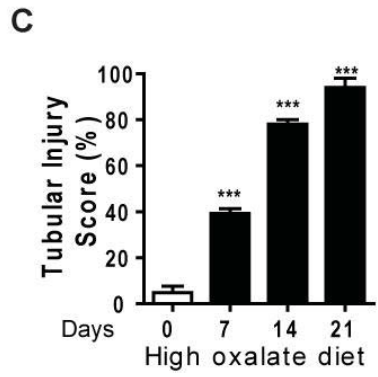

# Supplementary Figure 3

**A**

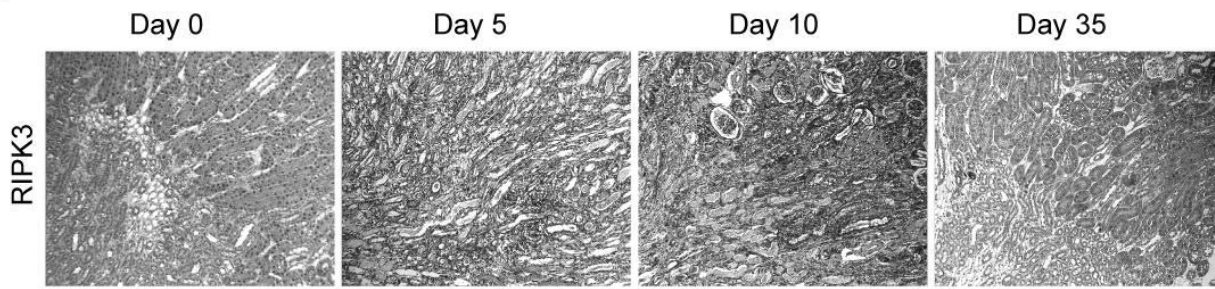

**B**

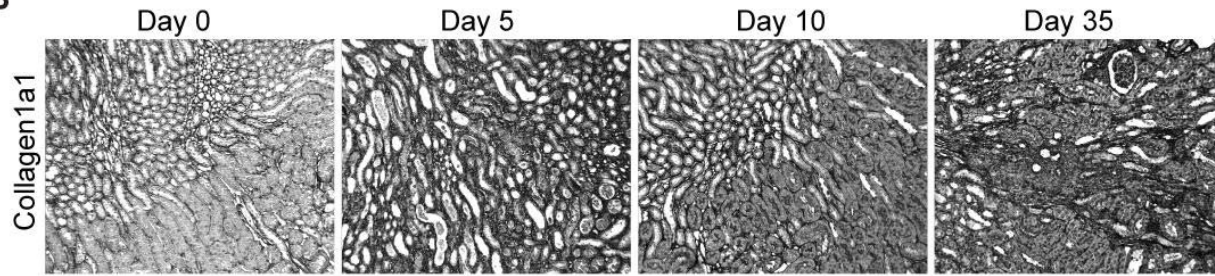

**C**

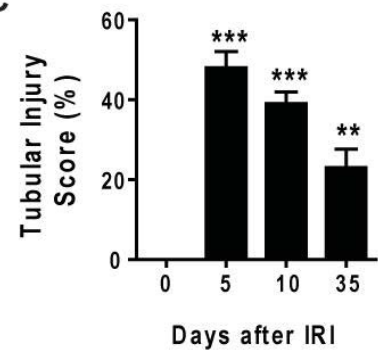

Supplement: bsr036e425add.pdf [file bsr036e425add.pdf]
